# Supplementary material
Source: Elsevier journal article supplement (https://www.sciencedirect.com/science/article/pii/S188558572500218X)

## **SUPPLEMENTARY DATA**

### **SUPPLEMENTARY METHODS**

The study consecutively enrolled adult patients (age  $\geq 18$  years) presenting with ECG-documented AF as a primary or secondary diagnosis in 250 centers from 27 participating countries from October 2013 to September 2016. The institutional review board approved the study protocol for each institution. The study was performed according to the EU Note for Guidance on Good Clinical Practice CPMP/ECH/135/95 and the Declaration of Helsinki. Participating countries were grouped into European regions as follows: *a)* Northern Europe—Denmark, Estonia, Latvia, Norway, UK; *b)* Western Europe—Belgium, France, Germany, Netherlands, Switzerland; *c)* Eastern Europe—Bulgaria, Czech Republic, Georgia, Kazakhstan, Kyrgyzstan, Poland, Romania, Russia; and *d)* Southern Europe—Albania, FYR Macedonia, Italy, Malta, Montenegro, Portugal, Serbia, Spain, Turkey.

Main inclusion criteria were the following: *a)* the qualifying AF event had to be recorded by a 12-lead ECG, 24-hour ECG Holter, or other electrocardiographic documentation within 12 months before enrollment; *b)* age should be 18 years and older; and *c)* a written informed consent form. The main exclusion criteria were the following: *a)* no objective proof of AF or *a)* being or planned to be enrolled in a pharmacological interventional clinical trial.

At the time of enrollment, investigators collected and recorded each patient's baseline characteristics, medical history, pharmacological treatment, and details of any prior clinical interventions or diagnostic procedures using a standardized electronic case report form.

Thromboembolic risk was defined according to the CHA<sub>2</sub>DS<sub>2</sub>-VASc score, and bleeding risk was assessed according to HAS-BLED. High-risk patients were defined as those with a CHA<sub>2</sub>DS<sub>2</sub>-VASc score greater than 2. Symptomatic status was defined according to the European Heart Rhythm Association (EHRA) score.

#### **Statistical analysis (details on multivariable models and interaction analysis)**

We built 2 different multivariable models: Model 1 was adjusted for CHA<sub>2</sub>DS<sub>2</sub>-VASc score, body mass index (BMI), chronic kidney disease (CKD, ie, creatinine clearance  $< 60$  mL/min calculated with the

Cockcroft-Gault equation), type of AF, chronic obstructive pulmonary disease (COPD), and use of oral anticoagulants (OAC); Model 2 was adjusted for BMI, smoking, lipid disorder, the individual components of the CHA2DS2-VASc score (age, sex, heart failure, hypertension, diabetes, prior stroke, vascular disease), valvular heart disease, dementia, CKD, COPD, malignancy, obstructive sleep apnea, type of AF, EHRA score, use of OAC, region of enrollment, and site of inclusion (hospital/outpatient). Covariates included in the multivariable models were selected a priori based on their clinical relevance in the context of AF epidemiology and their potential role as confounders. The proportional hazard assumption for Cox models was assessed through Schoenfeld residuals, with no critical violation observed across physical activity groups. The results are expressed as hazard ratio (HR) and 95% confidence interval (CI).

Interaction analyses were conducted to explore the association between physical activity and the risk of the primary composite outcome among various subgroups. These subgroups were sex, age categories (< 65 years, 65-75 years, > 75 years), the presence of heart failure, obesity (defined as BMI  $\geq 30$  kg/m<sup>2</sup>), peripheral artery disease (PAD), COPD, CKD, coronary artery disease (CAD), European regions, CHA2DS2-VASc score < 2 vs  $\geq 2$  (low vs high), and AF type. All interaction analyses were adjusted for the same variables included in the Cox regression model (Model 1). The results are reported as adjusted hazard ratio (aHR), with 95% confidence interval (CI), and p-value for interaction ( $P_{\text{int}}$ ). Moreover, we evaluated the interaction between age and left ventricular ejection fraction (LVEF), modeled as continuous variables, and physical activity on the risk of the primary outcome, using restricted cubic splines with 3 knots. For these analyses, we considered 65 years (for age) and 50% (for LVEF) as reference values (ie, HR = 1).

**Table 1 of the supplementary data.** Comparison of key clinical characteristics between excluded and included patients (cross-sectional phase)

|                              | Excluded patients<br>(n = 1571) | Included patients<br>(N = 9525) | <i>P</i> |
|------------------------------|---------------------------------|---------------------------------|----------|
| Age, y                       | 71.00 [63.00-78.00]             | 71.00 [62.00-77.00]             | .08      |
| Female sex                   | 608/1571 (38.7)                 | 3904/9525 (41.0)                | .08      |
| Permanent AF                 | 532/1528 (34.8)                 | 3186/9378 (34.0)                | .51      |
| Hypertension                 | 976/1549 (63.0)                 | 5856/9450 (62.0)                | .43      |
| Diabetes mellitus            | 330/1543 (21.4)                 | 2207/9485 (23.3)                | .10      |
| Smoking (current)            | 103/1048 (9.8)                  | 879/9221 (9.5)                  | .75      |
| Lipid disorder               | 599/1476 (40.6)                 | 3794/9145 (41.5)                | .51      |
| Heart failure                | 447/1543 (29.0)                 | 3899/9458 (41.2)                | < .001   |
| Dilated CMP                  | 120/1544 (7.8)                  | 867/9415 (9.2)                  | .06      |
| Coronary artery disease      | 447/1506 (29.7)                 | 2611/8925 (29.3)                | .73      |
| Prior TE events              | 178/1527 (11.7)                 | 1096/9465 (11.6)                | .93      |
| Peripheral artery disease    | 108/1507 (7.2)                  | 775/9346 (8.3)                  | .13      |
| COPD                         | 125/1552 (8.1)                  | 855/9459 (9.0)                  | .20      |
| Malignancy (current + prior) | 131/1558 (8.4)                  | 687/9463 (7.3)                  | .10      |
| CKD                          | 174/1551 (11.2)                 | 1207/9464 (12.8)                | .09      |
| Multimorbidity               | 981/1243 (78.9)                 | 6169/7830 (78.8)                | .91      |

AF, atrial fibrillation; CKD, chronic kidney disease; CMP, cardiomyopathy; COPD, chronic obstructive pulmonary disease; TE, thromboembolic.

The data are presented as No. (%) or median [interquartile range].

**Table 2 of the supplementary data.** Baseline characteristics of patients stratified by physical activity levels

|                                        | Occasional<br>physical activity<br>(n = 3089, 56.9%) | Regular<br>physical activity<br>(n = 1981, 36.5%) | Intense<br>physical activity<br>(n = 361, 6.6%) | All<br>(n = 5431)   | P      |
|----------------------------------------|------------------------------------------------------|---------------------------------------------------|-------------------------------------------------|---------------------|--------|
| <i>Age, y</i>                          | 69.00 [61.00-76.00]                                  | 68.00 [60.00-74.00]                               | 64.00 [54.00-72.00]                             | 69.00 [61.00-76.00] | < .001 |
| <i>Female</i>                          | 1211/3089 (39.2)                                     | 595/1981 (30.0)                                   | 78/361 (21.6)                                   | 1884/5431 (34.7)    | < .001 |
| <i>BMI, kg/m<sup>2</sup></i>           | 27.20 [24.70-30.50]                                  | 26.80 [24.60-29.70]                               | 26.70 [24.10-31.10]                             | 27.20 [24.70-30.40] | .003   |
| <i>BSA, m<sup>2</sup></i>              | 1.91 [1.78-2.06]                                     | 1.94 [1.80-2.07]                                  | 1.97 [1.83-2.12]                                | 1.94 [1.80-2.09]    | < .001 |
| <i>LBM, kg</i>                         | 57.15 [48.55-63.83]                                  | 58.63 [50.61-64.10]                               | 60.91 [53.98-66.82]                             | 58.31 [49.75-64.59] | < .001 |
| <i>Site of inclusion</i>               |                                                      |                                                   |                                                 |                     | < .001 |
| Hospital                               | 1626/3089 (52.6)                                     | 905/1981 (45.7)                                   | 150/361 (41.6)                                  | 2681/5431 (49.4)    |        |
| Outpatient or office based             | 1463/3089 (47.4)                                     | 1076/1981 (54.3)                                  | 211/361 (58.4)                                  | 2750/5431 (50.6)    |        |
| <i>Region of enrolment*</i>            |                                                      |                                                   |                                                 |                     | < .001 |
| Western Europe                         | 706/3089 (22.9)                                      | 568/1981 (28.7)                                   | 95/361 (26.3)                                   | 1369/5431 (25.2)    |        |
| Southern Europe                        | 1355/3089 (43.9)                                     | 724/1981 (36.5)                                   | 77/361 (21.3)                                   | 2156/5431 (39.7)    |        |
| Northern Europe                        | 371/3089 (12.0)                                      | 397/1981 (20.0)                                   | 135/361 (37.4)                                  | 903/5431 (16.6)     |        |
| Eastern Europe                         | 657/3089 (21.3)                                      | 292/1981 (14.7)                                   | 54/361 (15.0)                                   | 1003/5431 (18.5)    |        |
| <i>AF type</i>                         |                                                      |                                                   |                                                 |                     | < .001 |
| First diagnosed                        | 469/3050 (15.4)                                      | 377/1953 (19.3)                                   | 81/349 (23.2)                                   | 927/5352 (17.3)     |        |
| Paroxysmal                             | 846/3050 (27.7)                                      | 588/1953 (30.1)                                   | 96/349 (27.5)                                   | 1530/5352 (28.6)    |        |
| Persistent                             | 565/3050 (18.5)                                      | 415/1953 (21.2)                                   | 98/349 (28.1)                                   | 1078/5352 (20.1)    |        |
| Long-standing persistent               | 152/3050 (5.0)                                       | 83/1953 (4.2)                                     | 22/349 (6.3)                                    | 257/5352 (4.8)      |        |
| Permanent                              | 1018/3050 (33.4)                                     | 490/1953 (25.1)                                   | 52/349 (14.9)                                   | 1560/5352 (29.1)    |        |
| <i>Hypertension</i>                    | 1914/3064 (62.5)                                     | 1142/1972 (57.9)                                  | 148/358 (41.3)                                  | 3204/5394 (59.4)    | < .001 |
| <i>Diabetes mellitus</i>               | 709/3078 (23.0)                                      | 315/1972 (16.0)                                   | 39/361 (10.8)                                   | 1063/5411 (19.6)    | < .001 |
| <i>Smoking (current)</i>               | 311/2999 (10.4)                                      | 195/1938 (10.1)                                   | 45/358 (12.6)                                   | 551/5295 (10.4)     | .36    |
| <i>Lipid disorder</i>                  | 1295/2969 (43.6)                                     | 725/1883 (38.5)                                   | 109/342 (31.9)                                  | 2129/5194 (41.0)    | < .001 |
| <i>Obstructive sleep apnea</i>         | 122/2985 (4.1)                                       | 59/1931 (3.1)                                     | 10/354 (2.8)                                    | 191/5270            | .12    |
| <i>Heart failure</i>                   | 1242/3066 (40.5)                                     | 577/1972 (29.3)                                   | 75/357 (21.0)                                   | 1894/5395 (35.1)    | < .001 |
| <i>Dilated CMP</i>                     | 269/3053 (8.8)                                       | 114/1966 (5.8)                                    | 22/355 (6.2)                                    | 405/5374 (7.5)      | < .001 |
| <i>Hypertrophic CMP</i>                | 102/3055 (3.3)                                       | 31/1968 (1.6)                                     | 7/355 (2.0)                                     | 140/5378 (2.6)      | < .001 |
| <i>Restrictive CMP</i>                 | 3/3055 (0.1)                                         | 8/1967 (0.4)                                      | 1/355 (0.3)                                     | 12/5377 (0.2)       | .07    |
| <i>Congenital heart disease</i>        | 29/3063 (0.9)                                        | 21/1972 (1.1)                                     | 5/356 (1.4)                                     | 55/5391 (1.0)       | .69    |
| <i>Pulmonary arterial hypertension</i> | 219/3040 (7.2)                                       | 81/1961 (4.1)                                     | 10/354 (2.8)                                    | 310/5355 (5.8)      | < .001 |
| <i>Coronary artery disease</i>         | 812/2879 (28.2)                                      | 462/1898 (24.3)                                   | 66/349 (18.9)                                   | 1340/5126 (26.1)    | < .001 |
| Prior MI                               | 355/812 (43.7)                                       | 206/462 (44.6)                                    | 38/66 (57.6)                                    | 599/1340 (44.7)     | .09    |
| Prior PCI                              | 303/812 (37.3)                                       | 206/462 (44.6)                                    | 34/66 (51.5)                                    | 543/1340 (40.5)     | .007   |
| Prior CABG                             | 128/812 (15.8)                                       | 84/462 (18.2)                                     | 11/66 (16.7)                                    | 223/1340 (16.6)     | .54    |
| Prior angina                           | 269/812 (33.1)                                       | 147/462 (31.8)                                    | 15/66 (22.7)                                    | 431/1340 (32.2)     | .22    |
| <i>Valvular alterations</i>            | 1441/3029 (47.6)                                     | 852/1948 (43.7)                                   | 136/355 (38.3)                                  | 2429/5332 (45.6)    | < .001 |
| <i>Prior TE events</i>                 | 340/3072 (11.1)                                      | 192/1975 (9.7)                                    | 25/360 (6.9)                                    | 557/5407 (10.3)     | .02    |

|                                              |                     |                      |                      |                      |        |
|----------------------------------------------|---------------------|----------------------|----------------------|----------------------|--------|
| <i>Prior ischemic stroke</i>                 | 174/3071 (5.7)      | 104/1975 (5.3)       | 9/360 (2.5)          | 287/5406 (5.3)       | .04    |
| <i>Prior TIA</i>                             | 100/3071 (3.3)      | 58/1975 (2.9)        | 10/360 (2.8)         | 168/5406 (3.1)       | .76    |
| <i>Prior EP/DVT</i>                          | 61/3071 (2.0)       | 31/1975 (1.6)        | 7/360 (1.9)          | 99/5406 (1.8)        | .55    |
| <i>Prior hemorrhagic events</i>              | 154/3070 (5.0)      | 89/1973 (4.5)        | 15/358 (4.2)         | 258/5401 (4.8)       | .62    |
| <i>Peripheral vascular disease</i>           | 251/3031 (8.3)      | 119/1942 (6.1)       | 12/358 (3.4)         | 382/5331 (7.2)       | < .001 |
| <i>Liver disease</i>                         | 91/3078 (3.0)       | 52/1966 (2.6)        | 5/358 (1.4)          | 148/5402 (2.7)       | .22    |
| <i>COPD</i>                                  | 234/3068 (7.6)      | 130/1966 (6.6)       | 17/360 (4.7)         | 381/5394 (7.1)       | .07    |
| <i>Dementia</i>                              | 27/3083 (0.9)       | 13/1978 (0.7)        | 0/361 (0.0)          | 40/5422 (0.7)        | .16    |
| <i>Anemia</i>                                | 734/2696 (27.2)     | 464/1690 (27.5)      | 58/296 (19.6)        | 1256/4682 (26.8)     | .01    |
| <i>Malignancy (current + prior)</i>          | 199/3074 (6.5)      | 123/1968 (6.3)       | 25/361 (6.9)         | 347/5403 (6.4)       | .88    |
| <i>Hyperthyroidism</i>                       | 128/3008 (4.3)      | 86/1950 (4.4)        | 13/352 (3.7)         | 227/5310 (4.3)       | .83    |
| <i>Hypothyroidism</i>                        | 283/3012 (9.4)      | 164/1951 (8.4)       | 22/352 (6.3)         | 469/5315 (8.8)       | .10    |
| <i>CKD</i>                                   | 369/3079 (12.0)     | 136/1972 (6.9)       | 15/359 (4.2)         | 520/5410 (9.6)       | < .001 |
| <i>Creatinine, mg/dL</i>                     | 0.98 (0.81-1.19)    | 0.97 (0.82-1.12)     | 0.94 (0.80-1.12)     | 0.98 (0.82-1.16)     | .12    |
| <i>CrCl (C-G), mL/min</i>                    | 76.91 [57.28-99.18] | 80.66 [62.43-101.33] | 87.66 [69.14-114.86] | 79.26 [60.01-101.03] | < .001 |
| <i>CHA<sub>2</sub>DS<sub>2</sub>-VASc</i>    | 3.00 [2.00-4.00]    | 2.00 [1.00-3.00]     | 1.00 [1.00-3.00]     | 3.00 [2.00-4.00]     | < .001 |
| <i>HAS-BLED</i>                              | 2.00 [1.00-2.00]    | 1.00 [1.00-2.00]     | 1.00 [1.00-2.00]     | 1.00 [1.00-2.00]     | < .001 |
| <i>EHRA score</i>                            | 2.00 [1.00-2.00]    | 2.00 [1.00-2.00]     | 2.00 [1.00-2.00]     | 2.00 [1.00-2.00]     | .03    |
| <i>Multimorbidity</i>                        | 2018/2541 (79.4)    | 1182/1686 (70.1)     | 178/309 (57.6)       | 3378/4536 (74.5)     | < .001 |
| <i>No. of comorbidities</i>                  | 3 [2-5]             | 2 [1-4]              | 2 [1-3]              | 3 [1-4]              | < .001 |
| <i>Echocardiographic parameters</i>          |                     |                      |                      |                      |        |
| <i>LVEF, %</i>                               | 55.00 [45.00-62.00] | 57.00 [47.00-63.00]  | 58.00 [50.00-64.00]  | 55.00 [46.00-62.00]  | .02    |
| <i>Left atrial enlargement</i>               | 1669/2054 (81.3)    | 929/1196 (77.7)      | 133/185 (71.9)       | 2731/3435 (79.5)     | .002   |
| <i>LA diameter indexed, cm/m<sup>2</sup></i> | 2.28 (2.01-2.58)    | 2.22 (1.97-2.52)     | 2.19 (1.92-2.38)     | 2.25 (1.99-2.56)     | < .001 |
| <i>ECG parameters</i>                        |                     |                      |                      |                      |        |
| <i>Bundle branch block</i>                   |                     |                      |                      |                      |        |
| <i>No</i>                                    | 2501/2921 (85.6)    | 1644/1857 (88.5)     | 290/321 (90.3)       | 4435/5099 (87.0)     |        |
| <i>LBBS</i>                                  | 231/2921 (7.9)      | 105/1857 (5.7)       | 15/321 (4.7)         | 351/5099 (6.9)       |        |
| <i>RBBB</i>                                  | 189/2921 (6.5)      | 108/1857 (5.8)       | 16/321 (5.0)         | 313/5099 (6.1)       |        |

AF, atrial fibrillation; BMI, body mass index; BSA, body surface area; CABG, coronary artery bypass grafting; CAD, coronary artery disease; CKD, chronic kidney disease; CMP, cardiomyopathy; COPD, chronic obstructive pulmonary disease; CrCl C-G, creatinine clearance according to Cockcroft-Gault formula; DVT, deep vein thrombosis; EHRA, European Heart Rate Association; IQR, interquartile range; LA, left atrium; LBBB, left bundle branch block; LBM, lean body mass; LVEF, left ventricular ejection fraction; MI, myocardial infarction; PCI, percutaneous coronary intervention; PE, pulmonary embolism; RBBB, right bundle branch block; TE, thromboembolic; TIA, transient ischemic attack.

The data are presented as No. (%) or median [interquartile range].

\*Regions of enrolment. Northern Europe: Denmark, Estonia, Latvia, Norway, UK; Western Europe: Belgium, France, Germany, Netherlands, Switzerland; Eastern Europe: Bulgaria, Czech Republic, Georgia, Kazakhstan, Kyrgyzstan, Poland, Romania, Russia; Southern Europe: Albania, FYR Macedonia, Italy, Malta, Montenegro, Portugal, Serbia, Spain, Turkey. Left atrial enlargement was defined based on American Society Echocardiography guidelines, with an indexed anteroposterior dimension  $> 2.3$  cm/m<sup>2</sup> considered abnormal for both men and women.

**Table 3 of the supplementary data.** Multivariable logistic regression analysis for factors associated with physical inactivity

|                                 | Multivariable analysis |           |          |
|---------------------------------|------------------------|-----------|----------|
|                                 | OR                     | 95%CI     | <i>P</i> |
| Age                             | 1.02                   | 1.01-1.02 | < .001   |
| Female sex                      | 1.90                   | 1.70-2.12 | < .001   |
| BMI                             | 1.04                   | 1.03-1.05 | < .001   |
| Permanent AF                    | 1.26                   | 1.12-1.42 | < .001   |
| Hypertension                    | 0.90                   | 0.80-1.00 | .050     |
| Diabetes mellitus               | 1.25                   | 1.11-1.43 | < .001   |
| Smoking                         | 1.16                   | 0.96-1.39 | .107     |
| Obstructive sleep apnea         | 1.36                   | 1.06-1.75 | .015     |
| Heart failure                   | 1.40                   | 1.24-1.58 | < .001   |
| Dilated cardiomyopathy          | 1.31                   | 1.08-1.61 | .008     |
| Hypertrophic cardiomyopathy     | 1.48                   | 1.08-2.03 | .014     |
| Pulmonary arterial hypertension | 1.16                   | 0.93-1.46 | .192     |
| Coronary artery disease         | 1.07                   | 0.95-1.20 | .296     |
| Valvular alterations            | 1.10                   | 0.98-1.23 | .079     |
| Prior thromboembolic events     | 1.15                   | 0.98-1.35 | .103     |
| Prior hemorrhagic events        | 1.04                   | 0.83-1.29 | .754     |
| Peripheral vascular disease     | 0.91                   | 0.75-1.10 | .331     |
| COPD                            | 1.29                   | 1.08-1.58 | .006     |
| Dementia                        | 1.55                   | 0.94-2.57 | .088     |
| Anemia                          | 1.24                   | 1.11-1.39 | < .001   |
| Malignancy                      | 1.13                   | 0.93-1.37 | .220     |
| Hyperthyroidism                 | 1.11                   | 0.86-1.42 | .429     |
| Chronic kidney disease          | 1.38                   | 1.18-1.63 | < .001   |

AF, atrial fibrillation; BMI, body mass index; CI, confidence interval; CKD, chronic kidney disease; COPD, chronic obstructive pulmonary disease; OR, odds ratio.

**Table 4 of the supplementary data.** Comparison of key clinical characteristics between excluded and included patients (longitudinal phase)

|                              | Excluded patients<br>(n = 1104) | Included patients<br>(n = 8421) | <i>P</i> |
|------------------------------|---------------------------------|---------------------------------|----------|
| Age, y                       | 69.00 [62.00-76.00]             | 71.00 (62.00-77.00]             | .002     |
| Female sex                   | 492/1104 (44.6)                 | 3412/8421 (40.5)                | .01      |
| Permanent AF                 | 387/1094 (35.4)                 | 2799/8282 (33.8)                | .29      |
| Hypertension                 | 727/1095 (66.4)                 | 5129/8355 (61.4)                | .001     |
| Diabetes mellitus            | 236/1099 (21.5)                 | 1971/8386 (23.5)                | .13      |
| Smoking (current)            | 136/1057 (12.9)                 | 743/8164 (9.1)                  | < .001   |
| Lipid disorder               | 439/1059 (41.5)                 | 3355/8086 (41.5)                | .98      |
| Heart failure                | 478/1098 (43.5)                 | 3421/8360 (40.9)                | .09      |
| Dilated CMP                  | 123/1087 (11.3)                 | 744/8328 (8.9)                  | .01      |
| Coronary artery disease      | 330/983 (33.6)                  | 2281/7942 (28.7)                | .002     |
| Prior TE events              | 109/1095 (10.0)                 | 987/8370 (11.8)                 | .07      |
| Peripheral artery disease    | 89/1065 (8.4)                   | 686/8281 (8.3)                  | .93      |
| COPD                         | 86/1095 (7.9)                   | 769/8364 (9.2)                  | .14      |
| Malignancy (current + prior) | 43/1092 (3.9)                   | 644/8371 (7.7)                  | < .001   |
| CKD                          | 140/1100 (12.7)                 | 1067/8364 (12.8)                | .98      |
| Multimorbidity               | 692/860 (80.5)                  | 5477/6970 (78.6)                | .20      |

AF, atrial fibrillation; CKD, chronic kidney disease; CMP, cardiomyopathy; COPD, chronic obstructive pulmonary disease; TE, thromboembolic.



**Table 5 of the supplementary data.** Risk of adverse outcomes across different levels of physical activity

|                                      | Unadjusted analysis |                  |                  | Adjusted analysis<br>Model 1 |                  |                  | Adjusted analysis<br>Model 2 |                  |                  |
|--------------------------------------|---------------------|------------------|------------------|------------------------------|------------------|------------------|------------------------------|------------------|------------------|
|                                      | HR                  | [95%CI]          | P                | HR                           | [95%CI]          | P                | HR                           | [95%CI]          | P                |
| <b>Primary outcome</b>               |                     |                  |                  |                              |                  |                  |                              |                  |                  |
| <i>Composite outcome<sup>a</sup></i> |                     |                  |                  |                              |                  |                  |                              |                  |                  |
| Physical inactivity (ref)            | -                   | -                | -                | -                            | -                | -                | -                            | -                | -                |
| Occasional physical activity         | <b>0.63</b>         | <b>0.55-0.71</b> | <b>&lt; .001</b> | <b>0.75</b>                  | <b>0.65-0.86</b> | <b>&lt; .001</b> | <b>0.82</b>                  | <b>0.71-0.96</b> | <b>.01</b>       |
| Regular physical activity            | <b>0.42</b>         | <b>0.35-0.50</b> | <b>&lt; .001</b> | <b>0.57</b>                  | <b>0.47-0.68</b> | <b>&lt; .001</b> | <b>0.65</b>                  | <b>0.53-0.80</b> | <b>&lt; .001</b> |
| Intense physical activity            | <b>0.31</b>         | <b>0.20-0.47</b> | <b>&lt; .001</b> | <b>0.52</b>                  | <b>0.33-0.82</b> | <b>.006</b>      | <b>0.59</b>                  | <b>0.36-0.95</b> | <b>.03</b>       |
| <b>Secondary outcomes</b>            |                     |                  |                  |                              |                  |                  |                              |                  |                  |
| <i>MACE<sup>b</sup></i>              |                     |                  |                  |                              |                  |                  |                              |                  |                  |
| Physical inactivity (ref)            | -                   | -                | -                | -                            | -                | -                | -                            | -                | -                |
| Occasional physical activity         | 0.62                | 0.52-0.74        | < .001           | 0.76                         | 0.64-0.91        | .004             | 0.81                         | 0.66-1.00        | .05              |
| Regular physical activity            | 0.50                | 0.41-0.63        | < .001           | 0.71                         | 0.56-0.89        | .004             | 0.83                         | 0.64-1.01        | .16              |
| Intense physical activity            | 0.26                | 0.14-0.48        | < .001           | 0.44                         | 0.22-0.85        | .01              | 0.53                         | 0.27-1.00        | .06              |
| <i>All-cause mortality</i>           |                     |                  |                  |                              |                  |                  |                              |                  |                  |
| Physical inactivity (ref)            | -                   | -                | -                | -                            | -                | -                | -                            | -                | -                |
| Occasional physical activity         | 0.58                | 0.49-0.67        | < .001           | 0.69                         | 0.59-0.81        | < .001           | 0.80                         | 0.67-0.96        | .01              |
| Regular physical activity            | 0.31                | 0.25-0.39        | < .001           | 0.43                         | 0.33-0.54        | < .001           | 0.52                         | 0.39-0.67        | < .001           |
| Intense physical activity            | 0.22                | 0.12-0.39        | < .001           | 0.42                         | 0.23-0.77        | .005             | 0.48                         | 0.25-0.91        | .02              |

ACS, acute coronary syndrome; AF, atrial fibrillation; aHR, adjusted hazard ratio; BMI, body mass index; CI, confidence interval; COPD, chronic obstructive pulmonary disease; CV, cardiovascular; MACE, major adverse cardiovascular events; OAC, oral anticoagulants; TE, thromboembolic events.

<sup>a</sup>Composite outcome: composite MACE and all-cause mortality.

<sup>b</sup>MACE = composite of any TE/ACS/CV death. Model 1 was adjusted for CHA<sub>2</sub>DS<sub>2</sub>-VASc score, BMI, use of OAC, chronic kidney disease, type of AF and COPD. Model 2 was adjusted for age, sex, BMI, smoking, lipid disorder, the individual components of the CHA<sub>2</sub>DS<sub>2</sub>-VASc score (heart failure,

hypertension, diabetes, prior stroke, vascular disease), valvular heart disease, dementia, chronic kidney disease, COPD, malignancy, obstructive sleep apnea, type of AF, EHRA score, use of OAC, region of enrolment and site of inclusion (hospital/outpatient).

**Figure 1 of the supplementary data.** Kaplan–Meier curves for MACE (Any TE/ACS/CV death). A. Cumulative curves according to physical activity vs physical inactivity. B. Cumulative curves according to increasing levels of physical activity

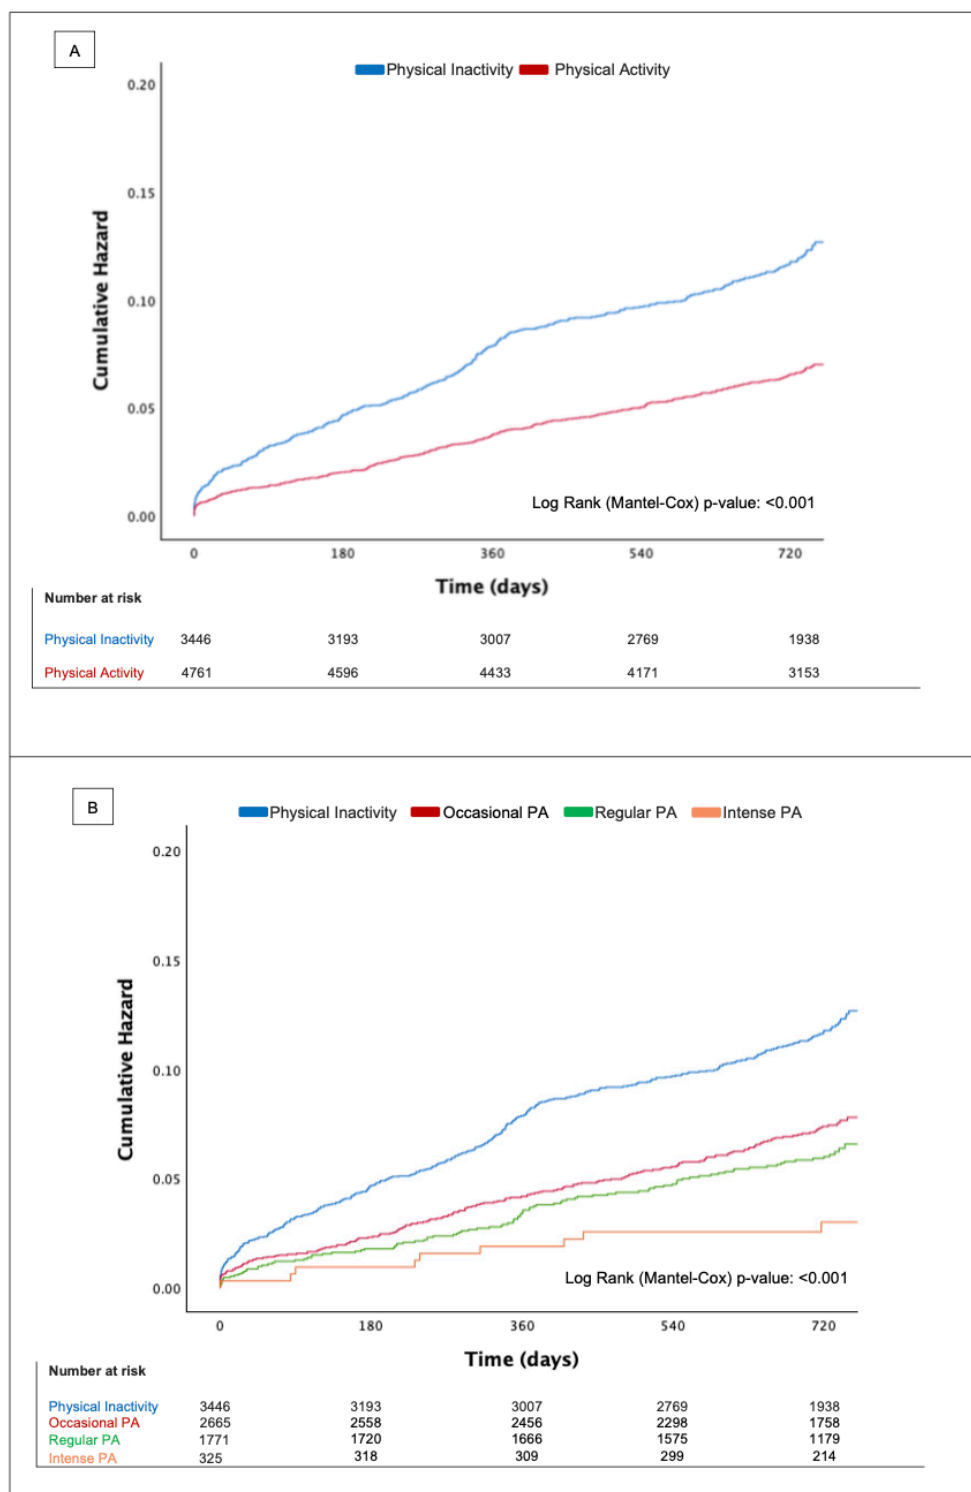

**Figure 2 of the supplementary data.** Kaplan–Meier curves for All-Cause Mortality. A. Cumulative curves according to physical activity vs physical inactivity. B. Cumulative curves according to increasing levels of physical activity.

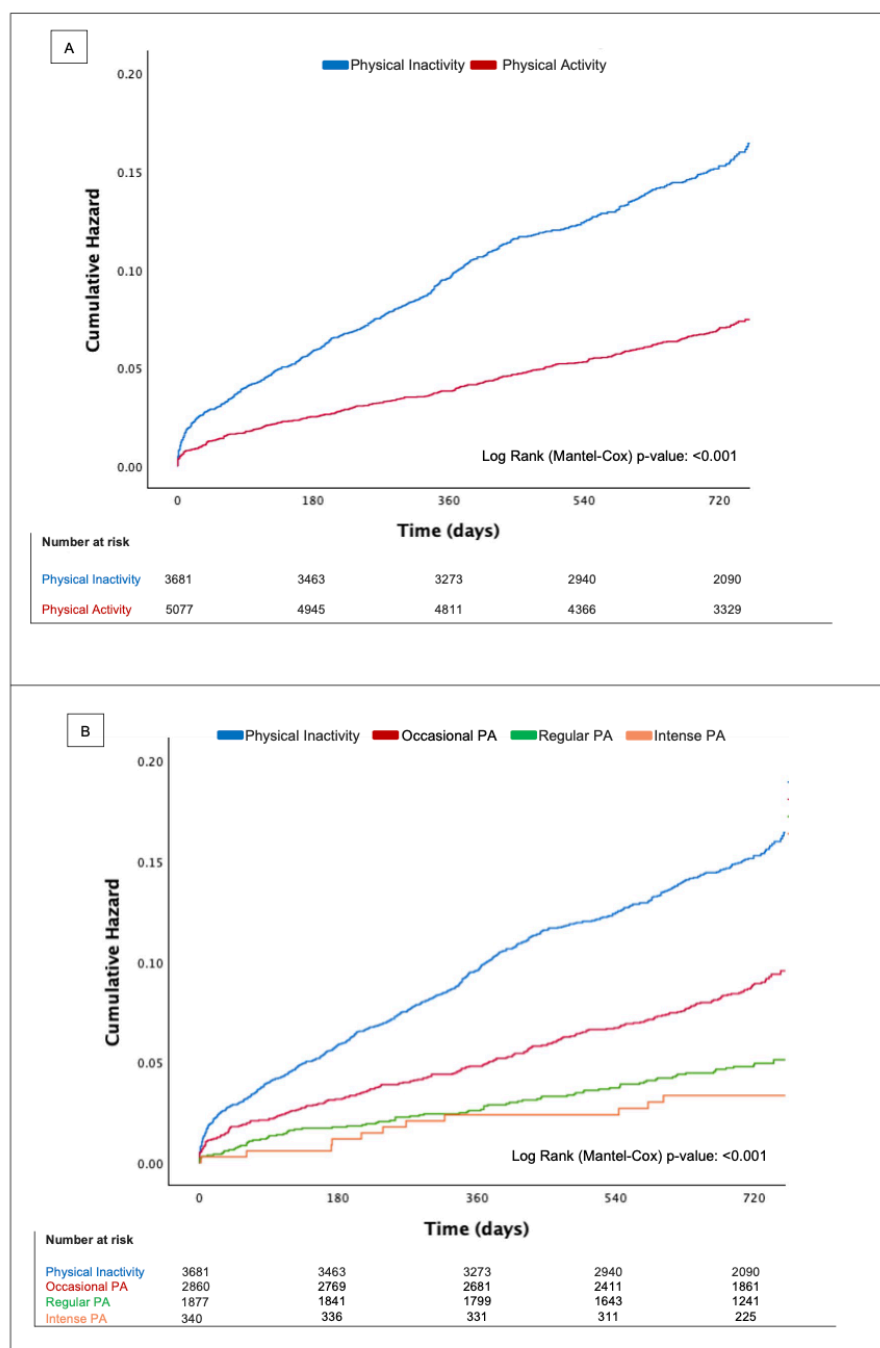

**Figure 3 of the supplementary data.** Sensitivity analysis. Kaplan–Meier curves and Cox regression analysis for study outcomes according to physical activity levels (excluding inactive AF patients)

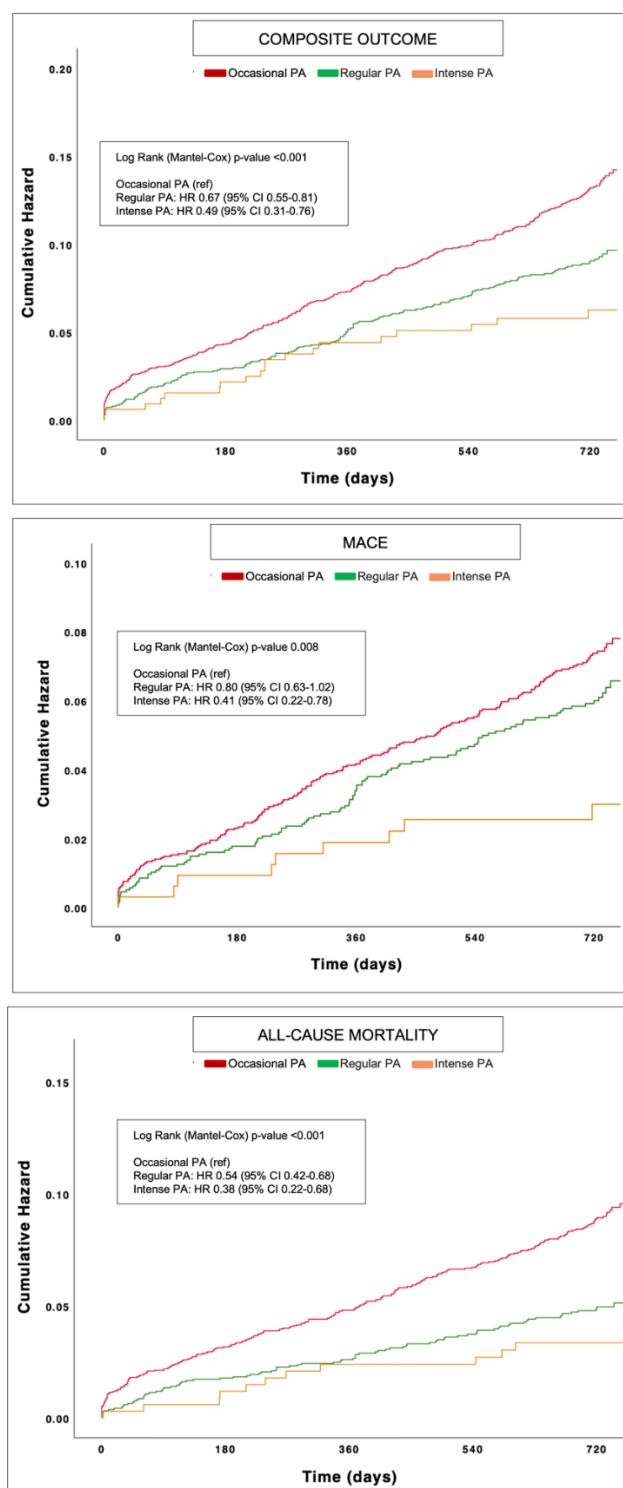

Supplement: mmc1 [file mmc1.pdf]
